# Supplementary material
Source: Springer Nature journal article supplement (https://www.springermedizin.de/resource/supplementary/12891_2008_556_MOESM2_ESM.pdf/9511328)

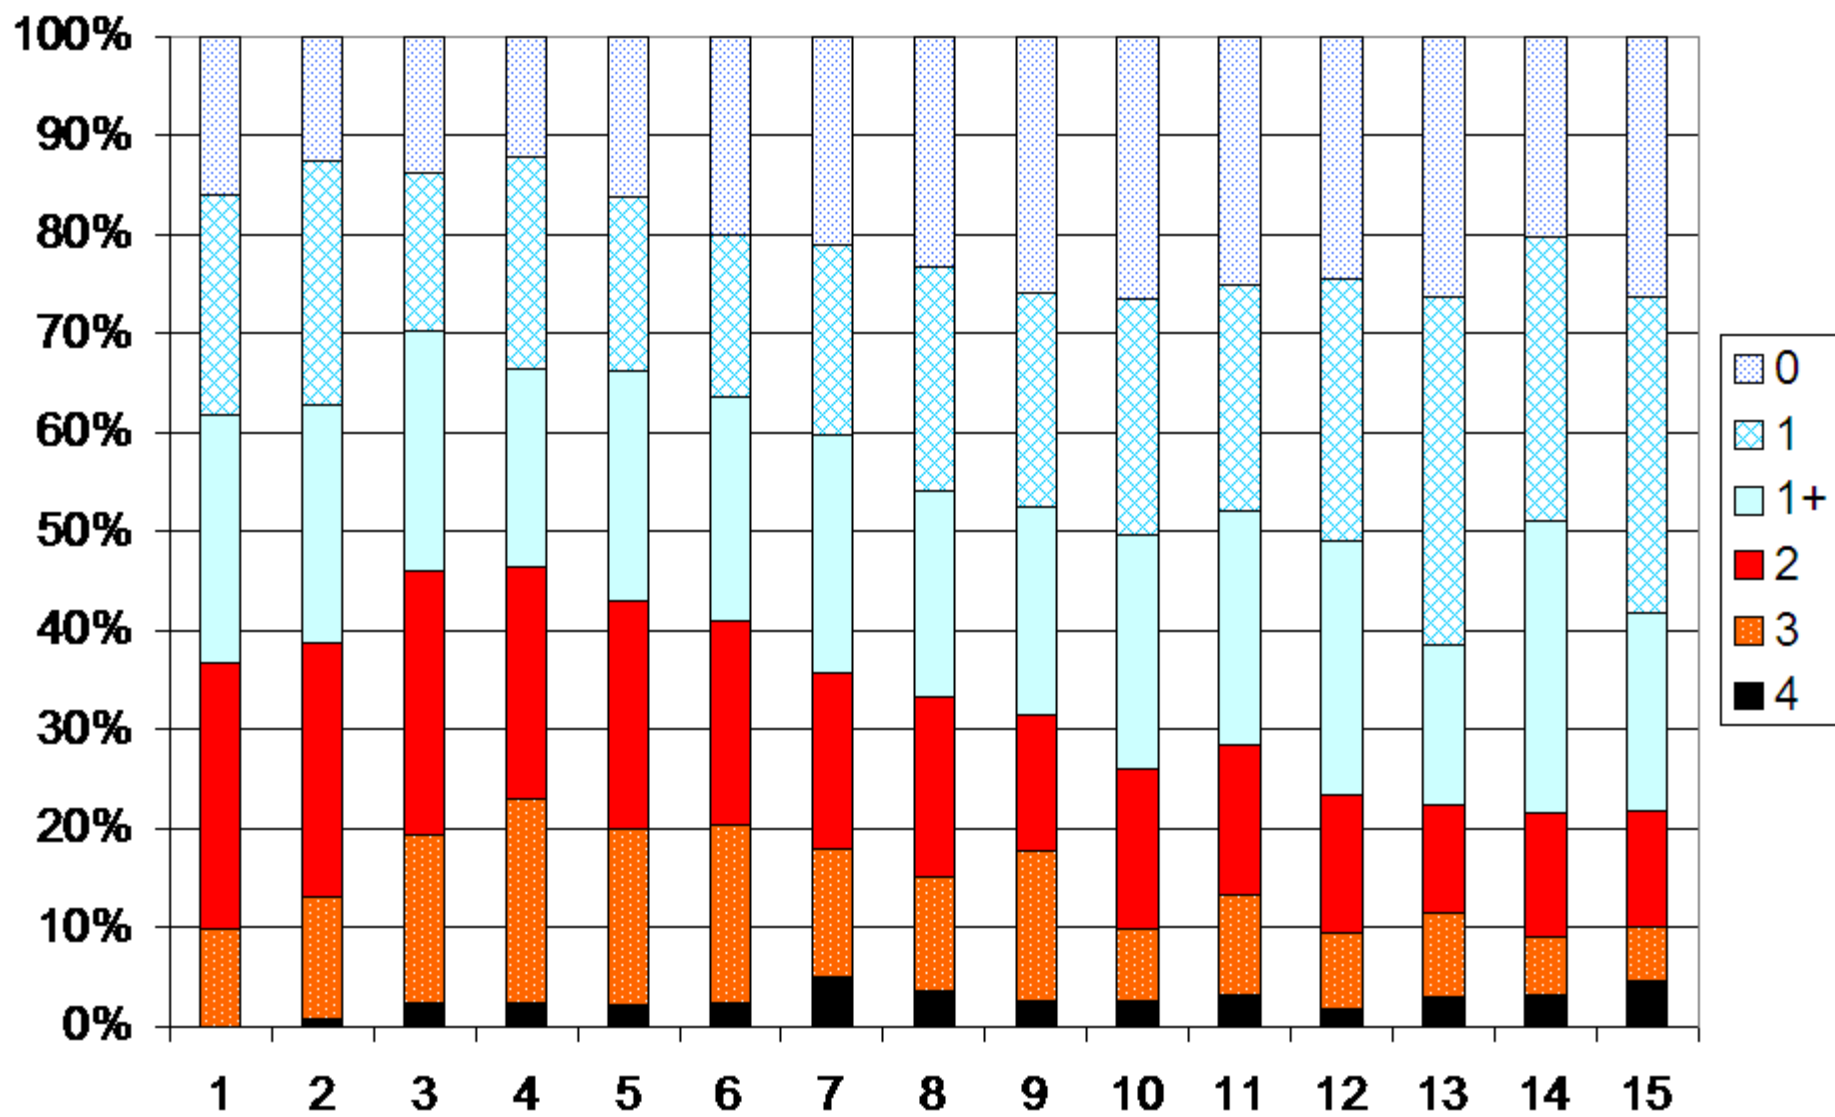

Supplement: MOESM2 [file 9511328]
